# Supplementary material
Source: PubMed Central journal article supplement (PMC6461852)
Supplement: 41431_2019_338_MOESM1_ESM.pdf [file 41431_2019_338_MOESM1_ESM.pdf]

Supplementary material to

**“Analysis of cilia dysfunction phenotypes in zebrafish embryos depleted of Origin recognition complex factors”**

by Lars D. Maerz\*, Teresa Casar Tena\*, Julian Gerhards, Cornelia Donow, Penelope A. Jeggo, Melanie Philipp

\* equal contribution



**F**, Both additional bands were excised and extracted from the gel and subsequently sequenced. This revealed skipping of exon 2 and the fusion of exon 1 and exon 3 for the smaller band (“1”), which in turn results in a stop codon (red). Start codon indicated in green. In the larger band (“2”), intron 1 was retained causing a premature stop codon, too.
